# Supplementary material
Source: PubMed Central journal article supplement (PMC7315573)
Supplement: ao0c01284_si_001.pdf [file ao0c01284_si_001.pdf]

## Supporting Information

# Thermoelectric properties of bismuth telluride thin films electrodeposited from a non-aqueous solution.

*Katarina Cicvarić<sup>a\*</sup>, Lingcong Meng<sup>b</sup>, Daniel W. Newbrook<sup>a</sup>, Ruomeng Huang<sup>a</sup>, Sheng Ye<sup>a</sup>, Wenjian Zhang<sup>b</sup>, Andrew L. Hector<sup>b</sup>, Gillian Reid<sup>b</sup>, Philip N. Bartlett<sup>b</sup> and C.H. (Kees) de Groot<sup>a</sup>*

<sup>a</sup> School of Electronics and Computer Science, University of Southampton, Southampton, SO17 1BJ, United Kingdom

<sup>b</sup> School of Chemistry, University of Southampton, Southampton, SO17 1BJ, United Kingdom

### Corresponding author

\*E-mail: K.Cicvaric@soton.ac.uk

### Section 1: Cyclic voltammetry

Prior to electrodeposition, cyclic voltammetry in an electrolyte containing 2.25 mM  $[\text{N}^n\text{Bu}_4][\text{BiCl}_4]$  and 3mM  $[\text{N}^n\text{Bu}_4]_2[\text{TeCl}_6]$  was performed to investigate the deposition of bismuth telluride. Figure 1 shows three consecutive cycles for  $[\text{N}^n\text{Bu}_4][\text{BiCl}_4]$  and  $[\text{N}^n\text{Bu}_4]_2[\text{TeCl}_6]$  in 0.1M  $[\text{N}^n\text{Bu}_4]\text{Cl}$  supporting electrolyte at a glass carbon (GC) working electrode. Scanning negatively in the first scan (black curve) two reduction peaks are observed at -0.75 and -1.4 V. The first peak at -0.75 V was attributed to the underpotential deposition of Bi onto already deposited Te in our previous work. The charge under the reduction peaks was

calculated to be 3.3mC. On the return scan there is a large oxidation peak starting from ca. -0.2 V and the second oxidation peak at 0.7 V. The charge calculated for oxidative stripping peaks is 1.4 mC, which is 42% of the reduction charge value indicating that the deposited  $\text{Bi}_2\text{Te}_3$  is not completely oxidised. On the second and third scan (red and blue curve, respectively), the two reduction peaks are noticeable as well. The first peaks at -0.75V vs. Ag/AgCl corresponds to the same position as in the first scan, however the reduction current is larger. The second peak at -1.3 V vs. Ag/AgCl is shifted towards more positive potential in comparison to the first scan. This change in voltammetry for the second and third scan is due to the modified electrode surface as the material is not fully oxidised after the first scan resulting in facilitated deposition onto already deposited material. The oxidative stripping for the second and third scan is very similar to the first scan in both potential and current.

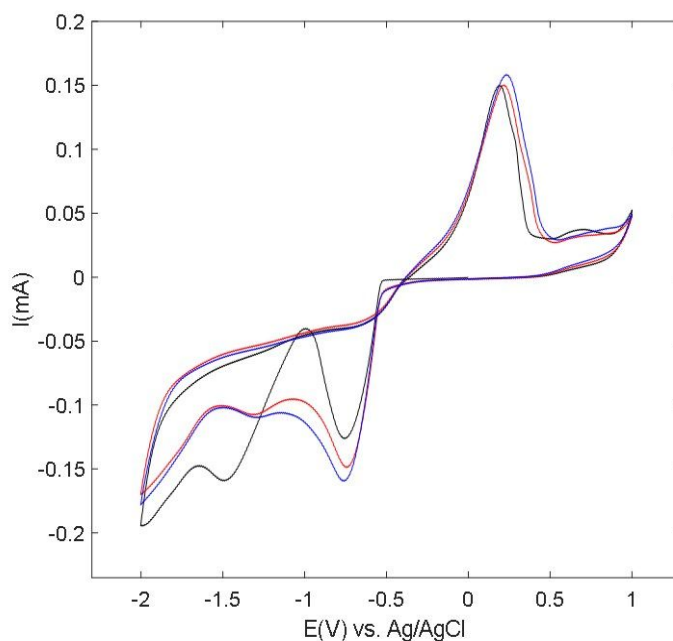

Figure S1: Three consecutive CVs for the reduction of 2.25 mM  $[\text{N}^n\text{Bu}_4][\text{BiCl}_4]$ , 3 mM  $[\text{N}^n\text{Bu}_4]_2[\text{TeCl}_6]$  in  $\text{CH}_2\text{Cl}_2$  solution containing 0.1 M  $[\text{N}^n\text{Bu}_4]\text{Cl}$  supporting electrolyte on a 3 mm diameter GC electrode. The scan rate is  $50 \text{ mV s}^{-1}$ . Black: 1<sup>st</sup> scan, red: 2<sup>nd</sup> scan, blue: 3<sup>rd</sup> scan.

**Section 2.** Image of a substrate with the electrodeposited bismuth telluride film on 7×11 mm area of working electrode (black). The film covers completely the area of working electrode.

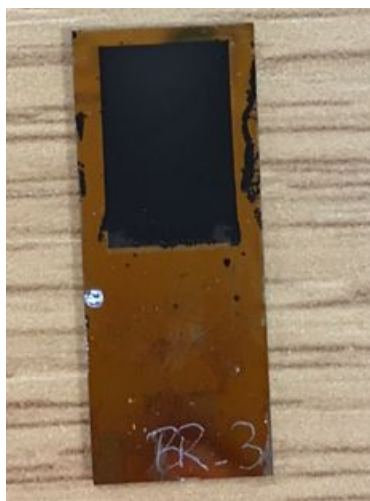

Figure S2. Image of the film electrodeposited by pulsed electrodeposition ( $t_{\text{on}}=5\text{s}$ ,  $t_{\text{off}}=10\text{ s}$ ) at -1 V vs. Ag/AgCl, with -1.3 C of the passed charge.

**Section 3.** Thickness of the electrodeposited bismuth telluride thin film was controlled by the passed charge, and calculated using Faraday's law:

$$Q = n z F = \frac{\rho A l z F}{M}$$

Where  $Q$  is the charge (C),  $n$  is the amount of substance (mol),  $\rho$  is bismuth telluride powder density ( $7.74\text{ g cm}^{-3}$ ),  $l$  is the film's thickness ( $\mu\text{m}$ ),  $A$  is the working electrode area ( $7\text{ mm} \times 11\text{ mm}$ ),  $z$  is number of exchanged electrons (18 electrons), and  $M$  is bismuth telluride molar mass ( $800.76\text{ g mol}^{-1}$ ).

Table S1. Nominal thicknesses of bismuth telluride thin films electrodeposited by different methods calculated from the passed charge.

| <b>Method</b>                               | <b>Potential vs. Ag/AgCl / V</b>                 | <b>Charge / C</b> | <b>Thickness / <math>\mu\text{m}</math></b> |
|---------------------------------------------|--------------------------------------------------|-------------------|---------------------------------------------|
| <b>Potentiostatic</b>                       | $E_{\text{dep}}=-1.0$                            | -1.3              | 1.00                                        |
| <b>Potentiostatic</b>                       | $E_{\text{dep}}=-0.8$                            | -1.3              | 1.00                                        |
| <b>Potentiostatic</b>                       | $E_{\text{dep}}=-0.6$                            | -1.3              | 1.00                                        |
| <b>Pulsed</b>                               | $E_{\text{dep}}=-1.0$                            | -1.2              | 0.95                                        |
| <b>Pulsed</b>                               | $E_{\text{dep}}=-0.8$                            | -1.8              | 1.40                                        |
| <b>Pulsed</b>                               | $E_{\text{dep}}=-0.6$                            | -2.3              | 1.80                                        |
| <b>Potentiostatic with nucleation pulse</b> | $E_{\text{dep}}=-0.6$ ,<br>$E_{\text{nuc}}=-1.4$ | -1.3              | 1.00                                        |
| <b>Potentiostatic with nucleation pulse</b> | $E_{\text{dep}}=-0.6$ ,<br>$E_{\text{nuc}}=-1.0$ | -1.3              | 1.00                                        |
| <b>Pulsed with nucleation pulse</b>         | $E_{\text{dep}}=-0.6$ ,<br>$E_{\text{nuc}}=-1.4$ | -1.8              | 1.40                                        |
| <b>Pulsed with nucleation pulse</b>         | $E_{\text{dep}}=-0.6$ ,<br>$E_{\text{nuc}}=-1.0$ | -0.6              | 0.50                                        |
